# Supplementary material for: Effect of Dipeptidyl Peptidase-4 Inhibitors vs. Metformin on Major Cardiovascular Events Using Spontaneous Reporting System and Real-World Database Study
Source: MDPI journal article supplement (doi:10.3390/jcm11174988), 2022-08-25
Supplement: s1 [file s1]

Table S3. ICD-10 codes for outcome definitions.

| Outcome                     | ICD-10 codes                                                             |
|-----------------------------|--------------------------------------------------------------------------|
| Major cardiovascular events | I21.x, I22.x, I60.x, I61.x, I63.x, I64.x (patient registers)             |
| Heart failure               | I11.0, I13.0, I13.2, I50.x, J81.x (patient registers and cause of death) |
| Myocardial infarction       | I21.x, I22.x (patient registers and cause of death)                      |
| Stroke                      | I60.x, I61.x, I63.x, I64.x (patient registers and cause of death)        |
| Cardiovascular death        | I00.x-I99.x, R57.0, R96.0, R96.1 (patient registers and cause of death)  |
