# Supplementary material for: Effect of Dipeptidyl Peptidase-4 Inhibitors vs. Metformin on Major Cardiovascular Events Using Spontaneous Reporting System and Real-World Database Study
Source: MDPI journal article supplement (doi:10.3390/jcm11174988), 2022-08-25
Supplement: s1 [file s1]

Table S5. Baseline characteristics of new users of SGLT2 inhibitors and DPP4 inhibitors matched by propensity score (after matching)

|                                                      | All patients | DPP-4 inhibitors | Metformin    |       |
|------------------------------------------------------|--------------|------------------|--------------|-------|
| Characteristics                                      | (n = 4,948)  | (n = 2,474)      | (n = 2,474)  | P     |
| Male sex                                             | 3,499 (70.7) | 1,758 (71.1)     | 1,741 (70.4) | 0.617 |
| Age (mean ± standard deviation)                      | 52.2 ± 9.74  | 52.4 ± 9.89      | 52.0 ± 9.57  | 0.209 |
| <b>Comorbidities</b>                                 |              |                  |              |       |
| Ischemic heart disease                               | 310 (6.3)    | 164 (6.6)        | 146 (5.9)    | 0.319 |
| Valve disorders                                      | 26 (0.5)     | 12 (0.5)         | 14 (0.6)     | 0.845 |
| Cerebrovascular disease                              | 71 (1.4)     | 37 (1.5)         | 34 (1.4)     | 0.811 |
| Atrial fibrillation                                  | 36 (0.7)     | 20 (0.8)         | 16 (0.6)     | 0.616 |
| Other arrhythmia                                     | 152 (3.1)    | 76 (3.1)         | 76 (3.1)     | 1.000 |
| COPD                                                 | 28 (0.6)     | 17 (0.7)         | 11 (0.4)     | 0.344 |
| Other lung disease                                   | 530 (10.7)   | 259 (10.5)       | 271 (11.0)   | 0.613 |
| Venous thromboembolism                               | 49 (1.0)     | 27 (1.1)         | 22 (0.9)     | 0.478 |
| Cancer                                               | 579 (11.7)   | 310 (12.5)       | 269 (10.9)   | 0.077 |
| Liver disease                                        | 1,612 (32.6) | 820 (33.1)       | 792 (32.0)   | 0.413 |
| Rheumatic disease                                    | 91 (1.8)     | 44 (1.8)         | 47 (1.9)     | 0.833 |
| Psychiatric disorder                                 | 449 (9.1)    | 223 (9.0)        | 226 (9.1)    | 0.921 |
| Fracture                                             | 69 (1.4)     | 31 (1.3)         | 38 (1.5)     | 0.467 |
| Arterial disease (including amputation)              | 32 (0.6)     | 18 (0.7)         | 14 (0.6)     | 0.595 |
| Renal disease                                        | 1,086 (21.9) | 541 (21.9)       | 545 (22.0)   | 0.918 |
| Diabetic complications                               | 935 (18.9)   | 461 (18.6)       | 474 (19.2)   | 0.663 |
| <b>Use of diabetes drug</b>                          |              |                  |              |       |
| SGLT2                                                | 893 (18.0)   | 449 (18.1)       | 444 (17.9)   | 0.853 |
| Sulphonylureas                                       | 697 (14.1)   | 366 (14.8)       | 331 (13.4)   | 0.165 |
| Insulin                                              | 534 (10.8)   | 266 (10.8)       | 268 (10.8)   | 0.963 |
| GLP1 receptor agonists                               | 27 (0.5)     | 14 (0.6)         | 13 (0.5)     | 1.000 |
| Other antidiabetics (glitazones, glinides, acarbose) | 911 (18.4)   | 465 (18.8)       | 446 (18.0)   | 0.486 |
| <b>Use other drugs</b>                               |              |                  |              |       |
| ARB/ACE-I                                            | 1,712 (34.6) | 861 (34.8)       | 851 (34.4)   | 0.788 |
| Calcium-channel blocker                              | 1,530 (30.9) | 785 (31.7)       | 745 (30.1)   | 0.230 |
| Loop diuretic                                        | 20 (0.4)     | 12 (0.5)         | 8 (0.3)      | 0.503 |
| Other diuretic                                       | 133 (2.7)    | 68 (2.7)         | 65 (2.6)     | 0.861 |
| Beta-blocker                                         | 246 (5.0)    | 128 (5.2)        | 118 (4.8)    | 0.556 |
| Digoxin                                              | 4 (0.1)      | 2 (0.1)          | 2 (0.1)      | 1.000 |
| Nitrate                                              | 21 (0.4)     | 11 (0.4)         | 10 (0.4)     | 1.000 |
| Platelet inhibitors                                  | 188 (3.8)    | 97 (3.9)         | 91 (3.7)     | 0.710 |
| Anticoagulant                                        | 36 (0.7)     | 18 (0.7)         | 18 (0.7)     | 1.000 |
| Lipid lowering drug                                  | 2,129 (43.0) | 1,069 (43.2)     | 1,060 (42.8) | 0.818 |
| Antidepressant                                       | 217 (4.4)    | 107 (4.3)        | 110 (4.4)    | 0.890 |
| Antipsychotic                                        | 77 (1.6)     | 37 (1.5)         | 40 (1.6)     | 0.818 |
| Anxiolytic, hypnotic, or sedative                    | 462 (9.3)    | 236 (9.5)        | 226 (9.1)    | 0.660 |
| Beta-2 agonist inhalant                              | 42 (0.8)     | 21 (0.8)         | 21 (0.8)     | 1.000 |
| Anticholinergic inhalant                             | 10 (0.2)     | 6 (0.2)          | 4 (0.2)      | 0.754 |
| Glucocorticoid inhalant                              | 129 (2.6)    | 63 (2.5)         | 66 (2.7)     | 0.858 |
| Oral glucocorticoid                                  | 101 (2.0)    | 51 (2.1)         | 50 (2.0)     | 1.000 |
| NSAID                                                | 648 (13.1)   | 311 (12.6)       | 337 (13.6)   | 0.292 |
| Opioid                                               | 1 (0.0)      | 0 (0.0)          | 1 (0.0)      | 1.000 |
