# Supplementary material for: Effect of Dipeptidyl Peptidase-4 Inhibitors vs. Metformin on Major Cardiovascular Events Using Spontaneous Reporting System and Real-World Database Study
Source: MDPI journal article supplement (doi:10.3390/jcm11174988), 2022-08-25
Supplement: s1 [file s1]

Table S4. Baseline characteristics of new users of SGLT2 inhibitors and DPP4 inhibitors matched by propensity score (before matching)

|                                                      | All patients | DPP-4 inhibitors | Metformin    |         |
|------------------------------------------------------|--------------|------------------|--------------|---------|
| Characteristics                                      | (n = 8,388)  | (n = 5,531)      | (n = 2,857)  | P       |
| Male sex                                             | 5,964 (71.1) | 3,981 (72.0)     | 1,983 (69.4) | 0.015   |
| Age (mean ± standard deviation)                      | 53.3 ± 9.88  | 55.5 ± 9.26      | 51.0 ± 10.4  | < 0.001 |
| <b>Comorbidities</b>                                 |              |                  |              |         |
| Ischemic heart disease                               | 635 (7.6)    | 462 (8.4)        | 173 (6.1)    | < 0.001 |
| Valve disorders                                      | 55 (0.7)     | 41 (0.7)         | 14 (0.5)     | 0.200   |
| Cerebrovascular disease                              | 140 (1.7)    | 102 (1.8)        | 38 (1.3)     | 0.088   |
| Atrial fibrillation                                  | 80 (1.0)     | 63 (1.1)         | 17 (0.6)     | 0.017   |
| Other arrhythmia                                     | 310 (3.7)    | 226 (4.1)        | 84 (2.9)     | 0.009   |
| COPD                                                 | 44 (0.5)     | 32 (0.6)         | 12 (0.4)     | 0.426   |
| Other lung disease                                   | 1,006 (12.0) | 690 (12.5)       | 316 (11.1)   | 0.060   |
| Venous thromboembolism                               | 83 (1.0)     | 59 (1.1)         | 24 (0.8)     | 0.353   |
| Cancer                                               | 1,082 (12.9) | 776 (14.0)       | 306 (10.7)   | < 0.001 |
| Liver disease                                        | 2,810 (33.5) | 1,882 (34.0)     | 928 (32.5)   | 0.157   |
| Rheumatic disease                                    | 214 (2.6)    | 159 (2.9)        | 55 (1.9)     | 0.008   |
| Psychiatric disorder                                 | 777 (9.3)    | 495 (8.9)        | 282 (9.9)    | 0.177   |
| Fracture                                             | 133 (1.6)    | 93 (1.7)         | 40 (1.4)     | 0.357   |
| Arterial disease (including amputation)              | 65 (0.8)     | 48 (0.9)         | 17 (0.6)     | 0.191   |
| Renal disease                                        | 1,777 (21.2) | 1,095 (19.8)     | 682 (23.9)   | < 0.001 |
| Diabetic complications                               | 1,488 (17.7) | 853 (15.4)       | 635 (22.2)   | < 0.001 |
| <b>Use of diabetes drug</b>                          |              |                  |              |         |
| SGLT2                                                | 1,292 (15.4) | 673 (12.2)       | 619 (21.7)   | < 0.001 |
| Sulphonylureas                                       | 1,382 (16.5) | 978 (17.7)       | 404 (14.1)   | < 0.001 |
| Insulin                                              | 849 (10.1)   | 421 (7.6)        | 428 (15.0)   | < 0.001 |
| GLP1 receptor agonists                               | 295 (3.5)    | 14 (0.3)         | 281 (9.8)    | < 0.001 |
| Other antidiabetics (glitazones, glinides, acarbose) | 1,607 (19.2) | 1,070 (19.3)     | 537 (18.8)   | 0.558   |
| <b>Use other drugs</b>                               |              |                  |              |         |
| ARB/ACE-I                                            | 3,032 (36.1) | 2,034 (36.8)     | 998 (34.9)   | 0.098   |
| Calcium-channel blocker                              | 2,752 (32.8) | 1,909 (34.5)     | 843 (29.5)   | < 0.001 |
| Loop diuretic                                        | 72 (0.9)     | 64 (1.2)         | 8 (0.3)      | < 0.001 |
| Other diuretic                                       | 232 (2.8)    | 157 (2.8)        | 75 (2.6)     | 0.623   |
| Beta-blocker                                         | 442 (5.3)    | 304 (5.5)        | 138 (4.8)    | 0.216   |
| Digoxin                                              | 6 (0.1)      | 4 (0.1)          | 2 (0.1)      | 1.000   |
| Nitrate                                              | 46 (0.5)     | 32 (0.6)         | 14 (0.5)     | 0.644   |
| Platelet inhibitors                                  | 355 (4.2)    | 247 (4.5)        | 108 (3.8)    | 0.152   |
| Anticoagulant                                        | 71 (0.8)     | 52 (0.9)         | 19 (0.7)     | 0.210   |
| Lipid lowering drug                                  | 3,780 (45.1) | 2,537 (45.9)     | 1,243 (43.5) | 0.042   |
| Antidepressant                                       | 362 (4.3)    | 223 (4.0)        | 139 (4.9)    | 0.079   |
| Antipsychotic                                        | 136 (1.6)    | 84 (1.5)         | 52 (1.8)     | 0.316   |
| Anxiolytic, hypnotic, or sedative                    | 860 (10.3)   | 596 (10.8)       | 264 (9.2)    | 0.030   |
| Beta-2 agonist inhalant                              | 71 (0.8)     | 48 (0.9)         | 23 (0.8)     | 0.803   |
| Anticholinergic inhalant                             | 20 (0.2)     | 16 (0.3)         | 4 (0.1)      | 0.240   |
| Glucocorticoid inhalant                              | 205 (2.4)    | 127 (2.3)        | 78 (2.7)     | 0.233   |
| Oral glucocorticoid                                  | 222 (2.6)    | 169 (3.1)        | 53 (1.9)     | 0.001   |
| NSAID                                                | 1,204 (14.4) | 819 (14.8)       | 385 (13.5)   | 0.101   |
| Opioid                                               | 11 (0.1)     | 10 (0.2)         | 1 (0.0)      | 0.112   |
