# Supplementary material for: Effect of Dipeptidyl Peptidase-4 Inhibitors vs. Metformin on Major Cardiovascular Events Using Spontaneous Reporting System and Real-World Database Study
Source: MDPI journal article supplement (doi:10.3390/jcm11174988), 2022-08-25
Supplement: s1 [file s1]

Table S2. Variables included in propensity score, with definitions.

| Variable                                             | Codes                                                                                                                                                                                                        |
|------------------------------------------------------|--------------------------------------------------------------------------------------------------------------------------------------------------------------------------------------------------------------|
| <b>Demographic and socioeconomic characteristics</b> |                                                                                                                                                                                                              |
| Sex                                                  |                                                                                                                                                                                                              |
| Age                                                  |                                                                                                                                                                                                              |
| <b>Comorbidities</b>                                 | <b>ICD-10</b>                                                                                                                                                                                                |
| Ischemic heart disease                               | I11.x (not I11.0), I20.x, (not I20.0), I24.x, I25.x                                                                                                                                                          |
| Valve disorders                                      | I34.x-I37.x                                                                                                                                                                                                  |
| Cerebrovascular disease                              | G45.x (not G45.4), G46.x, I65.x-I69.x                                                                                                                                                                        |
| Atrial fibrillation                                  | I48.x                                                                                                                                                                                                        |
| Other arrhythmia                                     | I44.x-I47.x, I49.x                                                                                                                                                                                           |
| COPD                                                 | J44.x                                                                                                                                                                                                        |
| Other lung disease                                   | E66.2, J27.x, J40.x-J43.x, J45.x-J47.x, J60.x-J70.x, J84.x, J92.x, J96.x, J98.2, J98.3, R09.2, Z99.x                                                                                                         |
| Vemous thromboembolism                               | I26.x, I80.x (not I80.0), I81.x, I82.0, I82.2 - I82.9                                                                                                                                                        |
| Cancer                                               | C00.x-C97.x (not C44.x)                                                                                                                                                                                      |
| Liver disease                                        | B18.x, I85.0, I85.9, I98.2, K70.x-K77.x                                                                                                                                                                      |
| Rheumatic disease                                    | M05.x-M09.x, M30.x-M34.x, M35.1, M35.3, M45.x                                                                                                                                                                |
| Psychiatric disorder                                 | F04.x-F10.x, F20.x-F99.x                                                                                                                                                                                     |
| Fracture                                             | M48.4, M48.5, M84.3, S02.x (not S02.5), S12.x, S22.x, S32.x, S42.x, S52.x, S62.x, S72.x, S82.x, S92.x, T02.x, T08.x, T10.x, T12.x                                                                            |
| Arterial disease (including amputation)              | E11.5, E13.5, E14.5, I65.x, I70.x, I72.x-I74.x, I77.x, K55.0, K55.1                                                                                                                                          |
| Renal disease                                        | E11.2, E13.2, E14.2, I12.x, I13.x, N00.x-N08.x, N17.x-N19.x, N25.x-N27.x                                                                                                                                     |
| Diabetic complications                               | E11.0, E11.1, E11.3, E11.4, E11.6-E11.8, E13.0, E13.1, E13.3, E13.4, E13.6-E13.8, E14.0, E14.1, E14.3, E14.4, E14.6-E14.8, E16.0-E16.2, G59.0, G63.2, G99.0, H28.0, H35.8, H36.0, L98.4, M14.2, M14.6, M90.8 |
| <b>Diabetes drugs</b>                                | <b>ATCcode</b>                                                                                                                                                                                               |
| SGLT2                                                | A10BK01, A10BK02, A10BK03 ,A10BK04 ,A10BK05, A10BK06 ,A10BK07                                                                                                                                                |
| Sulphonylureas                                       | A10BB, A10BD01, A10BD04, A10BD06                                                                                                                                                                             |
| Insulin                                              | A10AB, A10AC, A10AD, A10AE                                                                                                                                                                                   |

|                                                      |                                                  |
|------------------------------------------------------|--------------------------------------------------|
| GLP1 receptor agonists                               | A10BJ01, A10BJ02, A10BJ03, A10BJ05               |
| Other antidiabetics (glitazones, glinides, acarbose) | A10BG, A10BX, A10BD04, A10BD06, A10BD09, A10BF01 |
| <b>Other drugs in the past year</b>                  |                                                  |
| ARB/ACE-I                                            | C09A-C09D                                        |
| Calcium-channel blocker                              | C08C, C08D                                       |
| Loop diuretic                                        | C03C, C03EB                                      |
| Other diuretic                                       | C03A, C03B, C03D, C03EA                          |
| Beta-blocker                                         | C07                                              |
| Digoxin                                              | C01AA05                                          |
| Nitrate                                              | C01DA                                            |
| Platelet inhibitors                                  | B01AC                                            |
| Anticoagulant                                        | B01AA, B01AF, B01AE07, B01AX05                   |
| Lipid lowering drug                                  | C10                                              |
| Antidepressant                                       | N06A                                             |
| Antipsychotic                                        | N05A                                             |
| Anxiolytic, hypnotic, or sedative                    | N05B, N05C                                       |
| Beta-2 agonist inhalant                              | R03AC                                            |
| Anticholinergic inhalant                             | R03BB                                            |
| Glucocorticoid inhalant                              | R03BA, R03AK                                     |
| Oral glucocorticoid                                  | H02AB                                            |
| NSAID                                                | M01A                                             |
| Opioid                                               | N02A                                             |
