# Supplementary material for: Effect of Dipeptidyl Peptidase-4 Inhibitors vs. Metformin on Major Cardiovascular Events Using Spontaneous Reporting System and Real-World Database Study
Source: MDPI journal article supplement (doi:10.3390/jcm11174988), 2022-08-25
Supplement: s1 [file s1]

Table S1. Exclusion criteria

| Exclusion criterion                 | Codes                                                                                                      |
|-------------------------------------|------------------------------------------------------------------------------------------------------------|
|                                     | <b><i>ICD-10</i></b>                                                                                       |
| Major cardiovascular events         | I00.x-I99.x, R57.0, R96.0, R96.1 (patient registers and cause of death )                                   |
| Heart failure                       | I11.0, I13.0, I13.2, I50.x, J81.x (patient registers and cause of death)                                   |
| Myocardial infarction               | I21.x, I22.x (patient registers and cause of death)                                                        |
| Stroke                              | I60.x, I61.x, I63.x, I64.x (patient registers and cause of death)                                          |
|                                     | <b><i>ATC code</i></b>                                                                                     |
| Metformin (Taking DPP-4 inhibitors) | A10BA02, A10BD02, A10BD03, A10BD05, A10BD14, A10BD15, A10BD16, A10BD17, A10BD18, A10BD20, A10BD23, A10BD26 |
| DPP-4 inhibitors (Taking Metformin) | A10BD19, A10BH01, A10BH02, A10BH03, A10BH04, A10BH05, A10BH06, A10BH07, A10BH08, A10BH51, A10BH52          |
